# Supplementary material for: A new ESIPT-based fluorescent probe for the highly sensitive detection of amine vapors
Source: Royal Society of Chemistry journal article supplement (doi:10.1039/d1nj01826d), 2021-01-01
Supplement: d1nj01826d1.pdf [file d1nj01826d1.pdf]

## Supporting Information

### A New ESIPT-Based Fluorescent Probe for the Highly Sensitive Detection of Amine Vapors

Cheng Bao,<sup>a</sup> Sufang Shao,<sup>a</sup> Haifeng Zhou,<sup>a, b</sup> and Yifeng Han\*<sup>a</sup>

<sup>a</sup> Department of Chemistry, Zhejiang Sci-Tech University, Hangzhou, 310018, China.

E-mail: [zstuchem@gmail.com](mailto:zstuchem@gmail.com) (Yifeng Han); Tel: +86-751-86843550;

<sup>b</sup> Hangzhou Xinqiao Biotechnology Co., Ltd., Hangzhou, 311199, China.

## Contents

|                                                 |     |
|-------------------------------------------------|-----|
| Photophysical properties of <b>HBTAc</b> .....  | S3  |
| Additional spectroscopic data.....              | S4  |
| The characterization data of <b>HBTAc</b> ..... | S13 |
| References.....                                 | S15 |

## Photophysical properties of HBTAc

Table S1 Photophysical properties of the probe.

| entry               | $\lambda_{ab}$ (nm) | $\lambda_{em}$ (nm) | $\Phi^a$           |
|---------------------|---------------------|---------------------|--------------------|
| <b>HBTAc</b>        | 321                 | 460                 | 0.001              |
| <b>HBTAc+ammoni</b> | 334                 | 460                 | 0.131 <sup>b</sup> |
| <b>a</b>            |                     |                     |                    |

(a) The quantum yield ( $\Phi$ ) of **HBTAc** and **HBTAc**-ammonia system were determined according to the literature.<sup>1</sup> (b)  $\Phi$  was determined in the present of 10 equiv. of ammonia.

$$\Phi_{Sample} = \frac{\Phi_{QS} \cdot A_{QS} \cdot F_{Sample} \cdot \lambda_{exQS} \cdot \eta_{Sample}^2}{A_{Sample} \cdot F_{QS} \cdot \lambda_{exSample} \cdot \eta_{QS}^2}$$

Where  $\Phi$  is quantum yield; A is absorbance at the excitation wavelength; F is integrated area under the corrected emission spectra;  $\lambda_{ex}$  is the excitation wavelength;  $\eta$  is the refractive index of the solution; the Sample and QS refer to the sample and the standard, respectively. We chose quinine sulfate in 0.1N H<sub>2</sub>SO<sub>4</sub> as standard, which has the quantum yield of 0.546.<sup>2</sup>

### Additional spectroscopic data

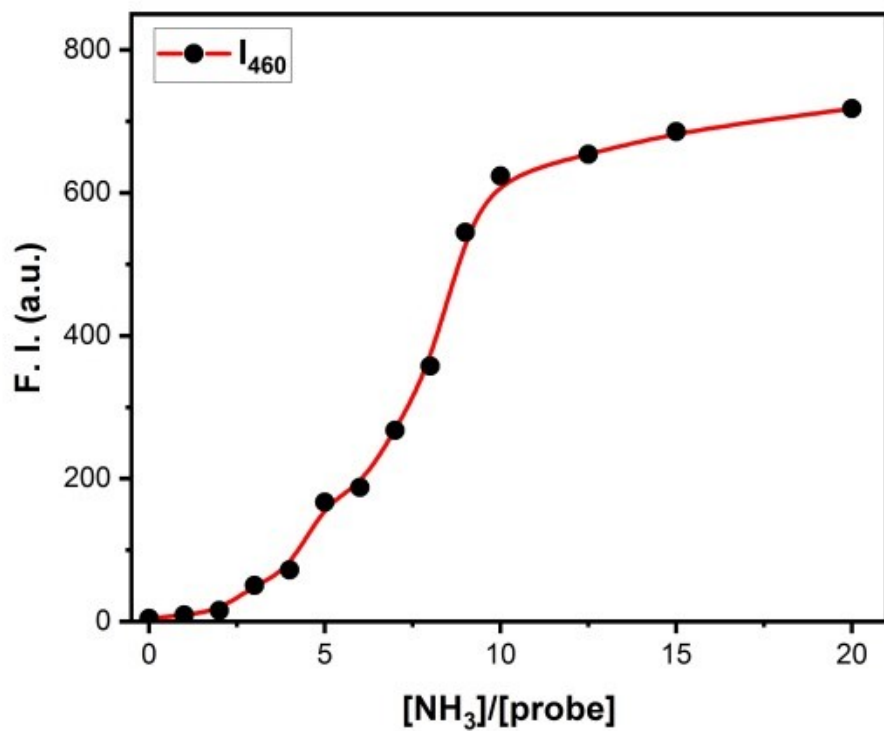

**Fig. S1** Fluorescent intensity of **HBTAc** (10.0  $\mu$ M, in aqueous solution) at 460 nm ( $I_{460}$ ) as a function of ammonia concentration (0-20 equiv.) ( $\lambda_{ex}$  = 365 nm).

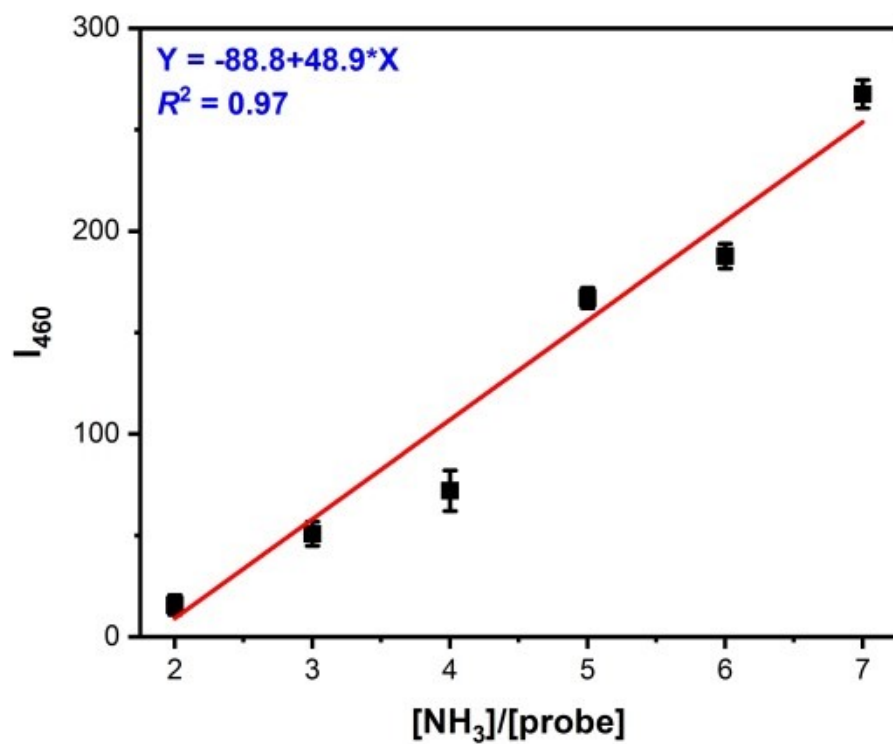

**Fig. S2** Fluorescent intensity of **HBTAc** (10.0  $\mu\text{M}$ , in aqueous solution) at 460 nm ( $I_{460}$ ) as a function of ammonia concentration (2.0-7.0 equiv.) ( $\lambda_{\text{ex}} = 365$  nm).

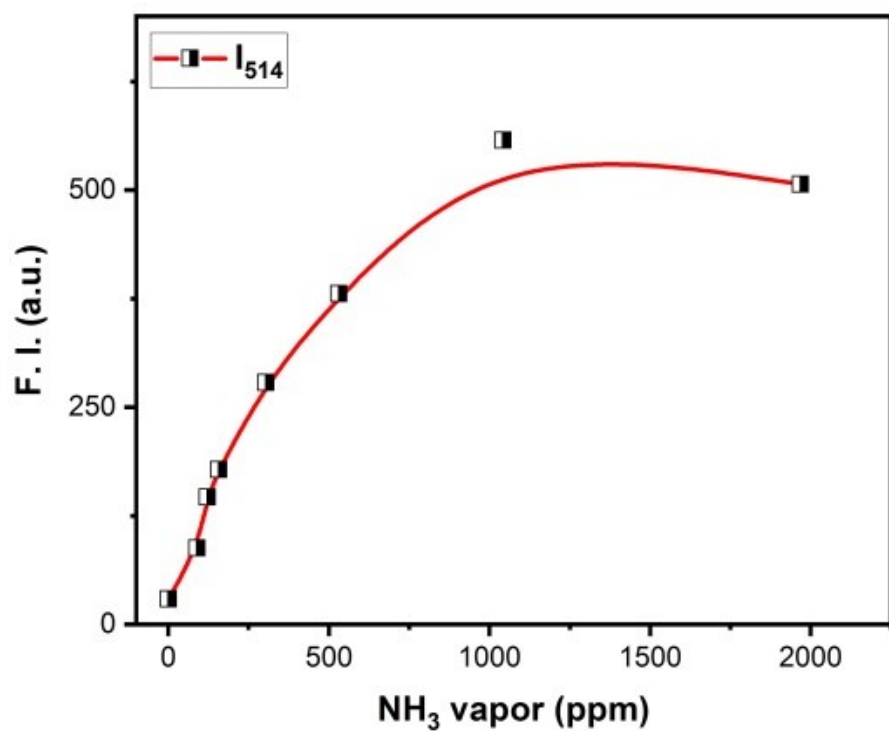

**Fig. S3.** Fluorescent intensity of **HBTAc**-loaded filter paper at 514 nm ( $I_{514}$ ) after exposure to ammonia vapor (0, 89, 122, 157, 304, 531, 1042, 1968 ppm) for 5 min. ( $\lambda_{ex} = 365$  nm).

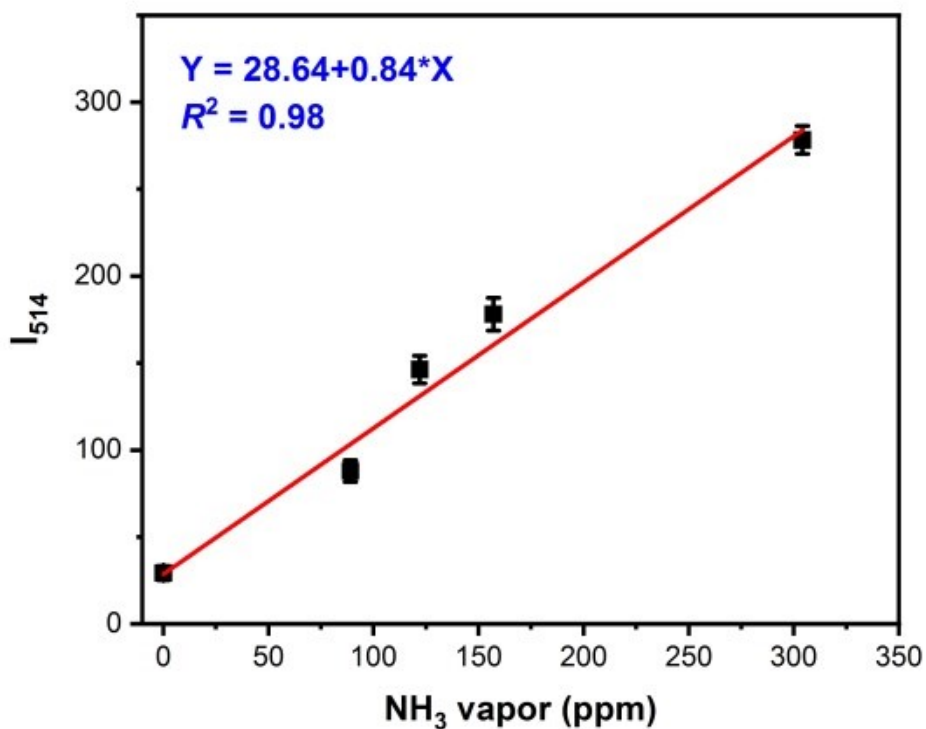

**Fig. S4** The changes of the fluorescent intensity of **HBTAc** at 514 nm ( $I_{514}$ ) as a function of ammonia vapor concentration (0-300 ppm) under the same condition as the ammonia vapor titration.

The detection limit (DL) of ammonia vapor using **HBTAc** was determined from the following equation:<sup>3</sup>

$$DL = 3 * \sigma / K$$

Where  $\sigma$  is the standard deviation of the blank solution; K is the slope of the calibration curve.

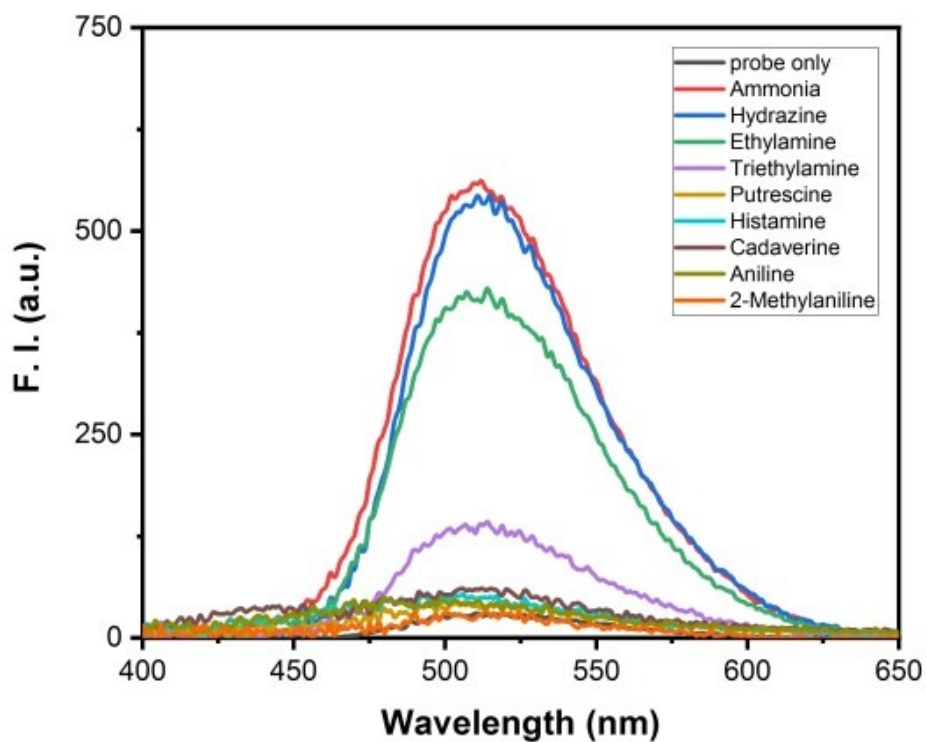

**Fig. S5** Fluorescence spectra of the probe **HBTAc**-loaded filter paper before and after exposure with various amine vapors generated from their corresponding aqueous solutions (including ammonia, hydrazine, ethylamine, triethylamine, putrescine, histamine, cadaverine, aniline, and 2-methylaniline) ( $\lambda_{ex} = 365$  nm).



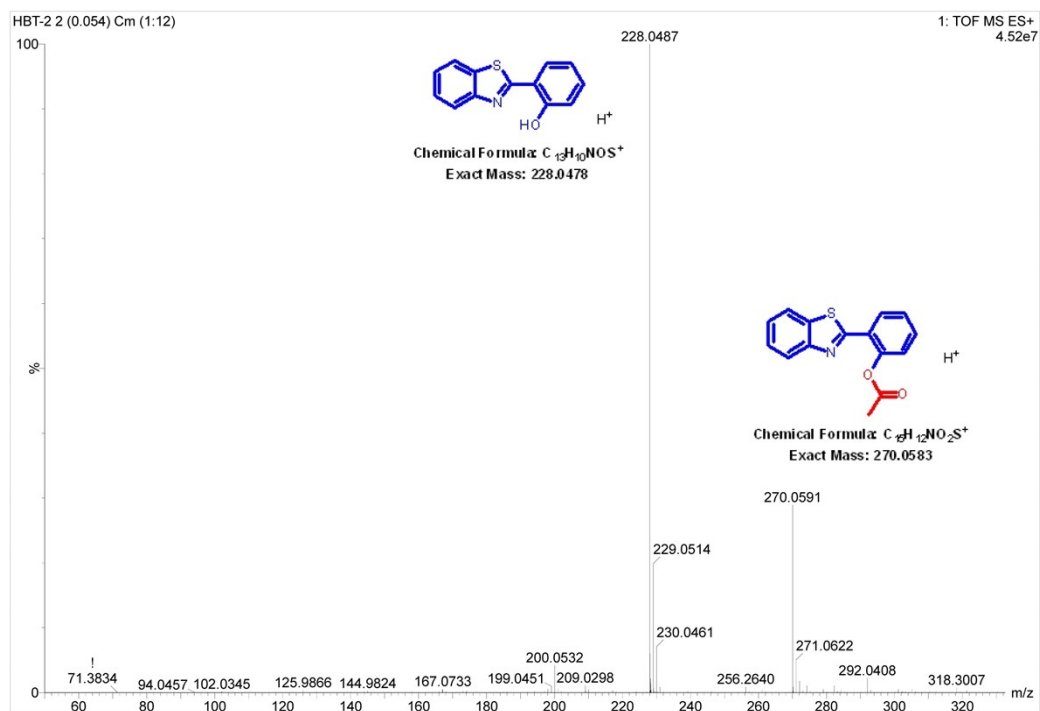

**Fig. S6** The HR-MS (TOF-ESI) experiment of the **HBTAc-N<sub>2</sub>H<sub>4</sub>** system (the **HBTAc** in the present of 0.3 equiv. of **N<sub>2</sub>H<sub>4</sub>**).

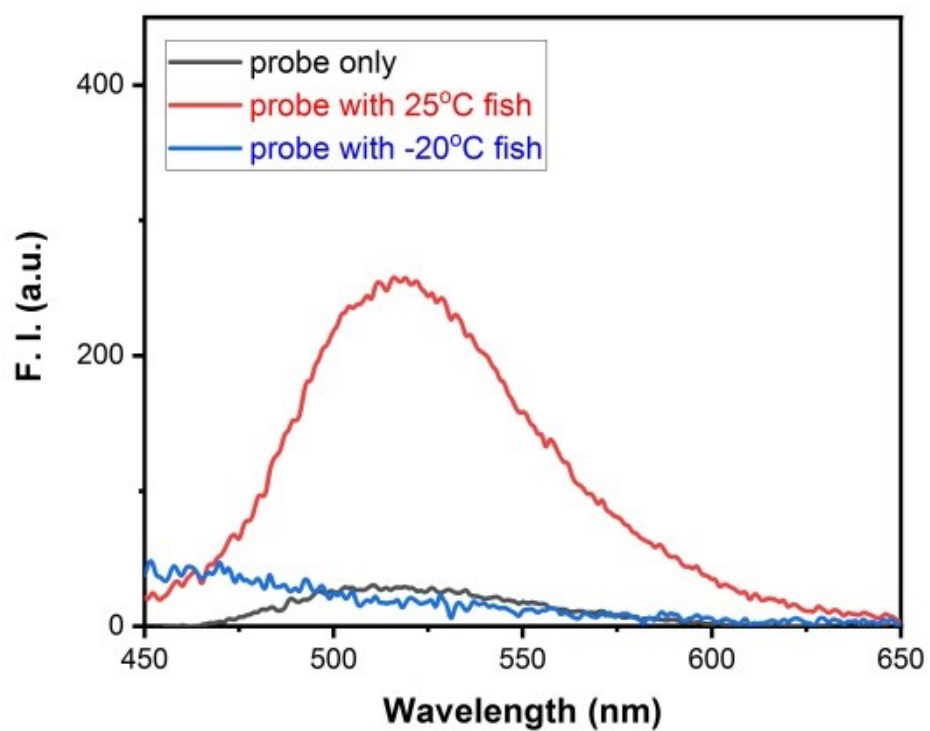

**Fig. S7** Fluorescent spectra of **HBTAc**-loaded filter paper after exposure to different pomfret samples (pomfret stored for one day at -20 °C and 25 °C, respectively) ( $\lambda_{ex} = 365$  nm).

**Table S2** Summary of some reported amine fluorescent probes.

| Structures                                                                          | $\lambda_{ex}/\lambda_{em}$<br>(nm) | LOD                     | Solution | Gaseous | References                                                         |
|-------------------------------------------------------------------------------------|-------------------------------------|-------------------------|----------|---------|--------------------------------------------------------------------|
| 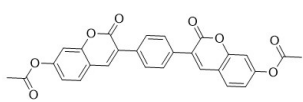   | 356/445                             | 6.85 ppm                | +        | +       | <i>Anal. Methods</i> , 2020, <b>12</b> , 1744-1751                 |
|    | 372/450                             | 1.01 ng/cm <sup>2</sup> | +        | +       | <i>ACS Appl. Mater. Interfaces</i> , 2018, <b>10</b> , 12112-12123 |
|    | 360/469                             | 2.61 Pa                 | -        | +       | <i>Talanta</i> , 2018, <b>178</b> , 522-529                        |
|    | 363/530                             | -                       | +        | +       | <i>Dyes Pigm.</i> , 2020, <b>178</b> , 108366-108373.              |
|   | 470/622                             | 10 ng                   | +        | +       | <i>J. Am. Chem. Soc.</i> , 2020, <b>142</b> , 9231-9239            |
|  | 390/573                             | 421 nM                  | +        | +       | <i>ACS Appl. Bio Mater.</i> , 2020, <b>3</b> , 772-778             |
|  | 333/492                             | -                       | +        | +       | <i>ACS Sens.</i> , 2016, <b>1</b> , 179-184                        |
|  | 580/656                             | 47 nM                   | +        | +       | <i>ACS Sustainable Chem. Eng.</i> , 2020, <b>8</b> , 4457-4463     |
|  | 375/594                             | 3.67 nM                 | +        | +       | <i>Dyes Pigm.</i> , 2020, <b>178</b> , 108346-108360               |
|  | 560/640                             | -                       | +        | +       | <i>Anal. Chem.</i> , 2019, <b>91</b> , 7360-7365                   |
|  | 375/409                             | 2.23 $\mu$ M            | +        | -       | <i>ACS Appl. Polym. Mater.</i> , 2019, <b>1</b> , 1485-1495        |

|                                                                                   |                    |          |   |   |                                                                        |
|-----------------------------------------------------------------------------------|--------------------|----------|---|---|------------------------------------------------------------------------|
| 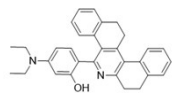 | 330/516            | 12.6 nM  | + | - | <i>J. Org. Chem.</i> , 2019, <b>84</b> ,<br>11513-11523                |
|  | 380/448            | 17 nM    | + | - | <i>Analyst</i> , 2016, <b>141</b> , 827-831                            |
|  | 372/490            | 610 ppb  | + | + | <i>J. Mater. Chem. C</i> , 2020, <b>8</b> ,<br>13723-13732             |
|  | 380/475            | 209 nM   | + | + | <i>Dyes Pigm.</i> , 2021, <b>186</b> ,<br>108963-108970                |
|  | 440/580            | 180 nM   | + | + | <i>ACS Appl. Mater. Interfaces.</i> ,<br>2019, <b>11</b> , 47207-47217 |
|  | 365/460<br>365/514 | 12.7 ppm | + | + | This work                                                              |



### $^{13}\text{C}$ NMR of 2-(benzo[d]thiazol-2-yl)phenyl acetate (HBTAc)

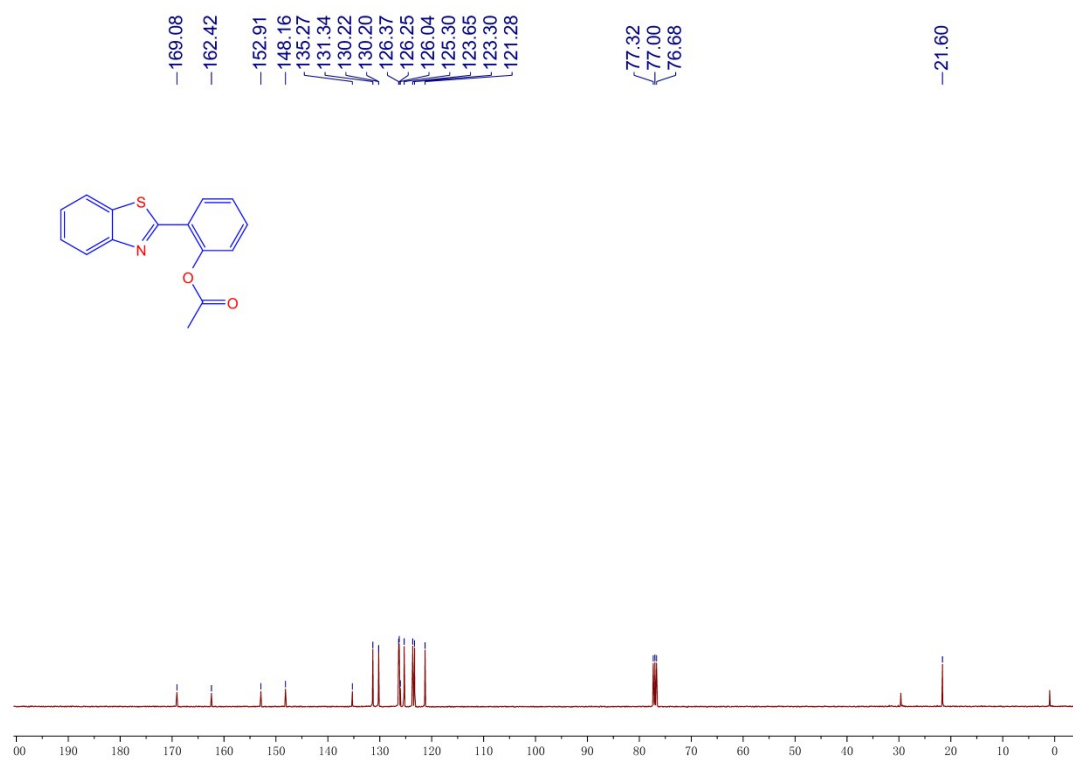

### HR-MS of 2-(benzo[d]thiazol-2-yl)phenyl acetate (HBTAc)

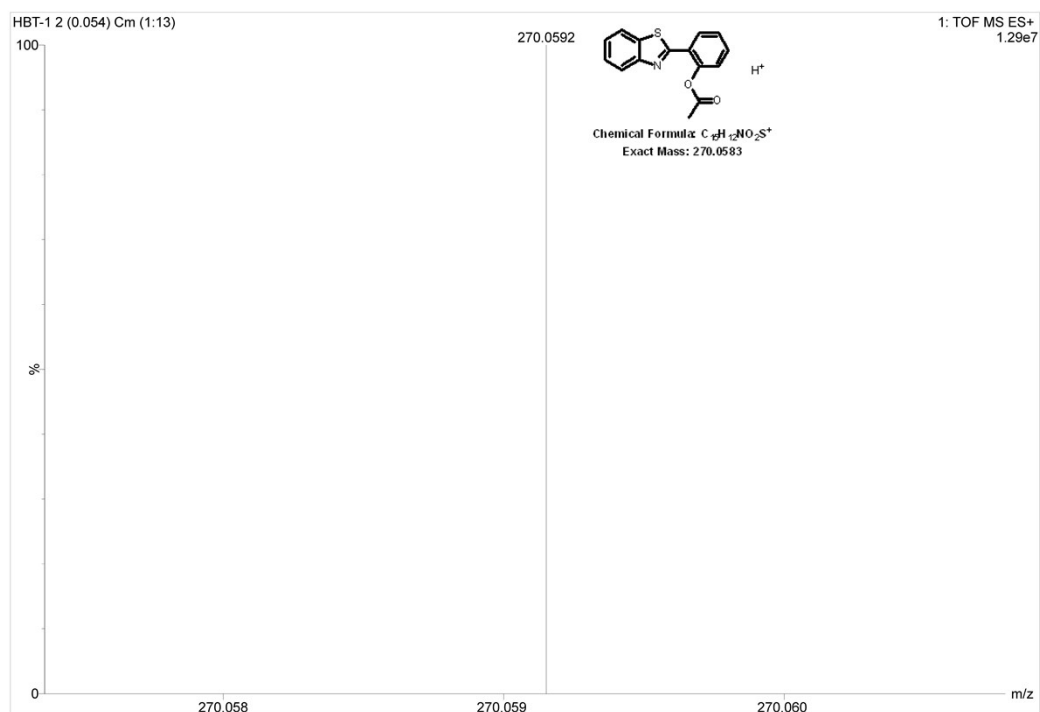

## References

- 1 R. A. Velapoldi, and H. H. Tønnesen, *J. Fluoresc.*, 2004, **14**, 465-472.
- 2 (a) D. F. Eaton, *Pure Appl. Chem.*, 1988, **60**, 1107-1114; (b) D. Magde, R. Wong, and P. G. Seybold, *Photochem. Photobiol.*, 2002, **75**, 327-334.
- 3 (a) J. T. Yeh, P. Venkatesan and S. P. Wu, *New J. Chem.*, 2014, **38**, 6198-6204. (b) A. Roy, D. Kand, T. Saha and P. Talukdar, *Chem. Commun.*, 2014, **50**, 5510-5513.
